# Supplementary material
Source: ML conference proceedings conference paper supplement (https://proceedings.neurips.cc/paper_files/paper/2018/hash/201e5bacd665709851b77148e225b332-Abstract.html)
Supplement: Supplementary file [file 201e5bacd665709851b77148e225b332-Supplemental.zip]

## A Edward2 on SciPy

We illustrate the broad applicability of our tracing implementation by applying SciPy as a back-end.

The implementation wraps `scipy.stats` distributions and registers each `rvs` method as `traceable`. Variables private from the namespace are explicitly prepended with underscore. Unlike Edward2 on TensorFlow Distributions, generative processes are recorded by calling `rvs` and wrapping Python functions, not Python classes. This is a result of `scipy.stats`'s functional API, which differs from TensorFlow Distributions' object-oriented one.

```
from scipy import stats

_globals = globals()
for _name in sorted(dir(stats)):
    _candidate = getattr(stats, _name)
    if isinstance(_candidate, (stats._multivariate.multi_rv_generic,
                               stats.rv_continuous,
                               stats.rv_discrete,
                               stats.rv_histogram)):
        _candidate.rvs = traceable(_candidate.rvs)
        _globals[_name] = _candidate
    del _candidate
```

Below is an Edward2 linear regression program on SciPy.

```
from edward2.scipy import stats as ed # assuming rvs decorated here

def linear_regression(features):
    coeffs = ed.norm.rvs(loc=0.0, scale=0.1, size=features.shape[1], name="coeffs")
    loc = np.einsum('ij,j->i', features, coeffs)
    labels = ed.norm.rvs(loc=loc, scale=1., size=1, name="labels")
    return labels

log_joint = ed.make_log_joint_fn(linear_regression)

features = np.random.normal(size=[3, 2])
coeffs = np.random.normal(size=[2])
labels = np.random.normal(size=[3])
out = log_joint(features, coeffs=coeffs, labels=labels)
```

See the link to source code for more details.

## B Grammar Variational Auto-Encoder

Below implements a grammar VAE [26]. It consists of a probabilistic encoder and decoder. It extends probabilistic context-free grammars with neural networks, latent codes, and an encoder for learning representations of discrete structures. The decoder's logits is 3-dimensional with shape `[batch_size, max_timesteps, num_production_rules]`.

The encoder takes a string as input and applies `parse_to_one_hot`, a preprocessing step which parses it into a parse tree, extracts production rules from the tree, and converts each production rule into a one-hot vector; it then applies a neural net and outputs a normally-distributed latent code.

The decoder takes a latent code as input and maps it to a sequence of production rules representing the generated string. It applies an RNN followed by a masking step so that the result is a valid sequence of production rules in the grammar. The production rules may then be converted to a string.

```
import parse_to_one_hot

class ProbabilisticGrammarVariational(tf.keras.Model):
```

```

"""Amortized variational posterior for a probabilistic grammar."""

def __init__(self, latent_size):
    """Constructs a variational posterior for a probabilistic grammar."""
    super(ProbabilisticGrammarVariational, self).__init__()
    self.latent_size = latent_size
    self.encoder_net = tf.keras.Sequential([
        tf.keras.layers.Conv1D(64, 3, padding="SAME"),
        tf.keras.layers.BatchNormalization(),
        tf.keras.layers.Activation(tf.nn.elu),
        tf.keras.layers.Conv1D(128, 3, padding="SAME"),
        tf.keras.layers.BatchNormalization(),
        tf.keras.layers.Activation(tf.nn.elu),
        tf.keras.layers.Dropout(0.1),
        tf.keras.layers.GlobalAveragePooling1D(),
        tf.keras.layers.Dense(latent_size * 2, activation=None),
    ])

def call(self, inputs):
    """Runs the model forward to return a stochastic encoding."""
    net = tf.cast(parse_to_one_hot(inputs), dtype=tf.float32)
    net = self.encoder_net(net)
    return ed.MultivariateNormalDiag(
        loc=net[..., :self.latent_size],
        scale_diag=tf.nn.softplus(net[..., self.latent_size:]),
        name="latent_code_posterior")

class ProbabilisticGrammar(tf.keras.Model):
    """Deep generative model over productions which follow a grammar."""

    def __init__(self, grammar, latent_size, num_units):
        """Constructs a probabilistic grammar."""
        super(ProbabilisticGrammar, self).__init__()
        self.grammar = grammar
        self.latent_size = latent_size
        self.lstm = tf.nn.rnn_cell.LSTMCell(num_units)
        self.output_layer = tf.keras.layers.Dense(len(grammar.production_rules))

    def call(self, inputs):
        """Runs the model forward to generate a sequence of productions."""
        del inputs # unused
        latent_code = ed.MultivariateNormalDiag(loc=tf.zeros(self.latent_size),
                                                sample_shape=1,
                                                name="latent_code")

        state = self.lstm.zero_state(1, dtype=tf.float32)
        t = 0
        productions = []
        stack = [self.grammar.start_symbol]
        while stack:
            symbol = stack.pop()
            net, state = self.lstm(latent_code, state)
            logits = self.output_layer(net) + self.grammar.mask(symbol)
            production = ed.OneHotCategorical(logits=logits,
                                              name="production_" + str(t))
            _, rhs = self.grammar.production_rules[tf.argmax(production, axis=1)]
            for symbol in rhs:
                if symbol in self.grammar.nonterminal_symbols:
                    stack.append(symbol)
            productions.append(production)
            t += 1
        return tf.stack(productions, axis=1)

```

See the link to source code for more details.

## C Markov chain Monte Carlo within Variational Inference

We demonstrate another level of composability: inference within a probabilistic program. Namely, we apply MCMC to construct a flexible family of distributions for variational inference [38, 20]. We apply a chain of transition kernels specified by NUTS (nuts) in [Section 3.2](#) and the variational inference algorithm specified by train in [Figure 12](#).

```
import nuts, train

IMAGE_SHAPE = (32, 32, 3, 256)

def model():
    """Generative model of 32x32x3 8-bit images."""
    decoder_net = tf.keras.Sequential([
        tf.keras.layers.Dense(512, activation=tf.nn.relu),
        tf.keras.layers.Dense(np.prod(IMAGE_SHAPE), activation=None),
        tf.keras.layers.Reshape(IMAGE_SHAPE),
    ])

    z = ed.Normal(loc=tf.zeros([FLAGS.batch_size, FLAGS.latent_size]),
                  scale=tf.ones([FLAGS.batch_size, FLAGS.latent_size]),
                  name="z")
    x = ed.Categorical(logits=decoder_net(z), name="x")
    return x

def variational(x):
    """Variational model given 32x32x3 8-bit images."""
    encoder_net = tf.keras.Sequential([
        tf.keras.layers.Reshape(np.prod(IMAGE_SHAPE)),
        tf.keras.layers.Dense(512, activation=tf.nn.relu),
        tf.keras.layers.Dense(FLAGS.latent_size * 2, activation=None),
    ])

    net = encoder_net(x)
    qz = ed.Normal(loc=net[:, :FLAGS.latent_size],
                  scale=tf.nn.softplus(net[:, FLAGS.latent_size:])),
                  name="qz")
    for _ in range(FLAGS.mcmc_iterations):
        qz = nuts(current_state=qz,
                  target_log_prob_fn=lambda z: ed.make_log_joint(model)(x=x, z=z))
    return qz

align_fn = lambda name: {'z': 'qz'}.get(name)
loss = train(0.1) # uses model, variational, align_fn, x in scope
```

## D No-U-Turn Sampler

We implement an Edward2 program for Bayesian logistic regression with NUTS.

```
import build_dataset

def logistic_regression(features):
    """Bayesian logistic regression for labels given features."""
    coeffs = ed.MultivariateNormalDiag(loc=tf.zeros(features.shape[1]), name="coeffs")
    labels = ed.Bernoulli(logits=tf.tensordot(features, coeffs, [[1], [0]]))
    return labels

def make_target_log_prob_fn():
    """Make target density with log-joint function anchored at data."""
    log_joint_fn = ed.make_log_joint_fn(model)
    def target_log_prob_fn(coeffs):
        return log_joint_fn(features=features, coeffs=coeffs, labels=labels)
    return target_log_prob_fn
```

```
features, labels = build_dataset()
coeffs = tf.random_normal(features.shape[1]) # initial state
samples = ed.nuts(current_state=coeffs,
                  target_log_prob_fn=make_target_log_prob_fn())
```

See the link to source code for more details.
